# Supplementary material for: miR-125b-5p Alleviates Allergic Airway Inflammation By Targeting TNFR2 To Regulate M1 Macrophage Polarization
Source: Research Square preprint supplement (doi:10.21203/rs.3.rs-6942394/v1), 2025-06-25
Supplement: Supplementary file 1 [file 27488503187c11bc299a0c1b.docx]

I have created a read-only link for the metadata here, which can directly access the data you need. I hope it can be helpful for your review work.

<https://dataview.ncbi.nlm.nih.gov/object/PRJNA1279146?reviewer=dd9e8gn64i4qfa2739r67h2p17>

SRA records will be accessible with the following link after the indicated release date:

https://submit.ncbi.nlm.nih.gov/subs/sra/

Accession to cite for these SRA data: PRJNA1279146

NCBI login account name: [monsieursong2023@163.com](mailto:monsieursong2023@163.com)

NCBI login password: SD19941121best

To protect data privacy, these data have been set to be publicly released after the manuscript is officially accepted. If you need me to change the release date, please contact me via email.
