# Supplementary material for: miR-125b-5p Alleviates Allergic Airway Inflammation By Targeting TNFR2 To Regulate M1 Macrophage Polarization
Source: Research Square preprint supplement (doi:10.21203/rs.3.rs-6942394/v1), 2025-06-25
Supplement: Supplementary file 2 [file fde90eca8c07e46520964402.docx]

**Table S1 Primer sequence**

| **Gene Name** | **direction** | **prodSize** | **Sequence** |
| --- | --- | --- | --- |
| **IL-1β** | **FORWARD** | **94** | **TCGCAGCAGCACATCAAC**  **AAG** |
| **IL-1β** | **REVERSE** | **94** | **TCCACGGGAAAGACACAG**  **GTAG** |
| **TNF-R2** | **FORWARD** | **108** | **CCCACCTGTCCCTCTTCAT**  **CG** |
| **TNF-R2** | **REVERSE** | **108** | **CTCGGTTGTTCTGGTCAA**  **GTAGC** |
| **hsa-miR-125b-5p** | **FORWARD** | **67** | **ACTGATAAATCCCTGAGACCCTAAC** |
| **hsa-miR-125b-5p** | **REVERSE** | **67** | **TATGGTTTTGACGACTGTGTGAT** |
